# Supplementary material for: Direct microfluidic antibiotic resistance testing in urine with smartphone capture: significant variation in sample matrix interference between individual human urine samples
Source: Royal Society of Chemistry journal article supplement (doi:10.1039/d1ra06867a), 2021-01-01
Supplement: d1ra06867a1.pdf [file d1ra06867a1.pdf]

## Supporting Information

### Direct microfluidic antibiotic resistance testing in urine with smartphone capture: significant variation in sample matrix interference between individual human urine samples

Sarah H Needs<sup>1</sup>, Sultan İlayda Dönmez<sup>1</sup> and Alexander Daniel Edwards<sup>1</sup>

<sup>1</sup>School of Pharmacy, University of Reading, UK

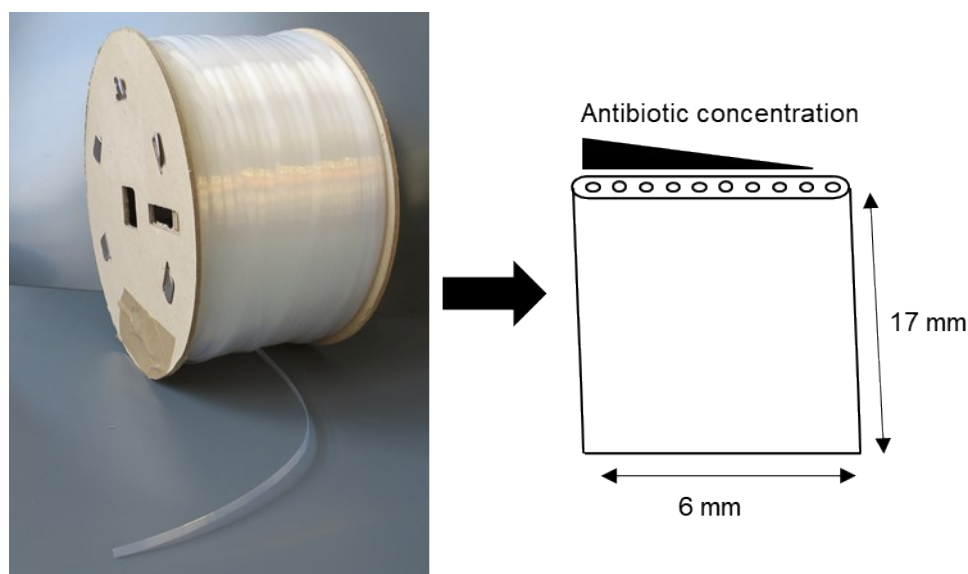

Figure S1. Large batches of microcapillary film are produced by melt-extrusion and transformed into miniaturised broth microdilution 'dip and test' strips

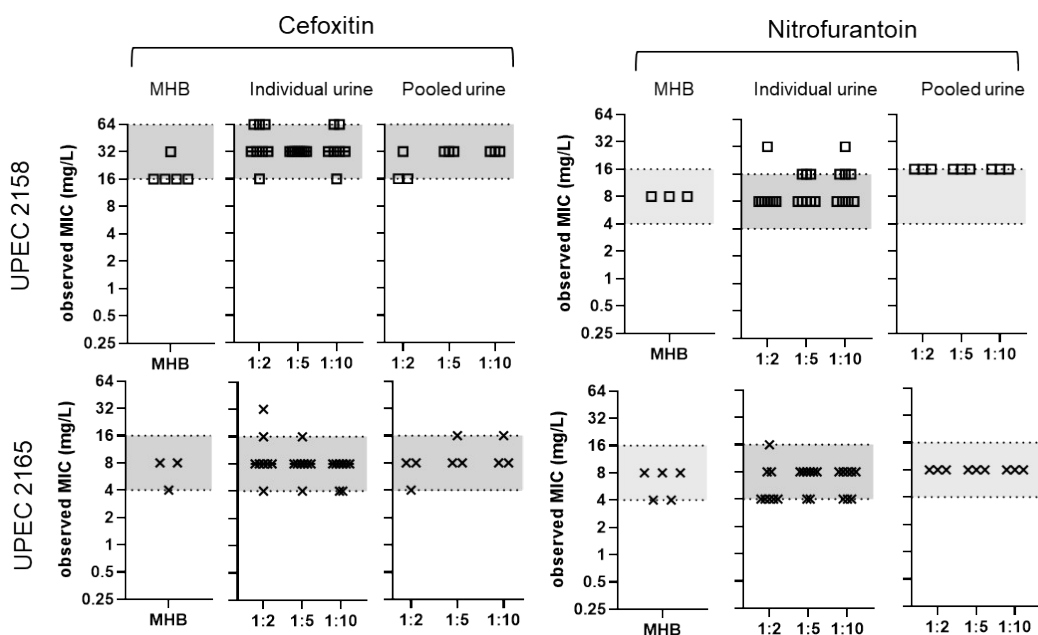

Figure S2. Minimal variation in MIC was observed with cefoxitin and nitrofurantoin for two uropathogenic *E. coli* isolates diluted in urine.  $n > 3$ . Each data points indicate a microcapillary BMD test. For individual urine samples, each data points indicate a different urine sample with at least seven urine samples tested.

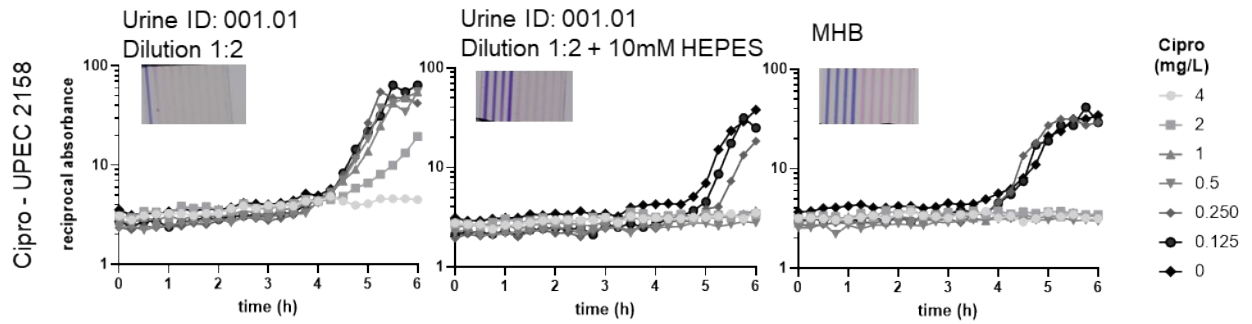

Figure S3. Growth curves of MIC for ciprofloxacin for UPEC 2158 in urine sample 001.01 diluted 1:2 without and with HEPES 10 mM or in MHB alone. Image insert indicates microfluidic test strips with antibiotic concentration left to right: 4,2,1,0.5,0.25,0.125,0.062,0.031,0.016,0 mg/L.

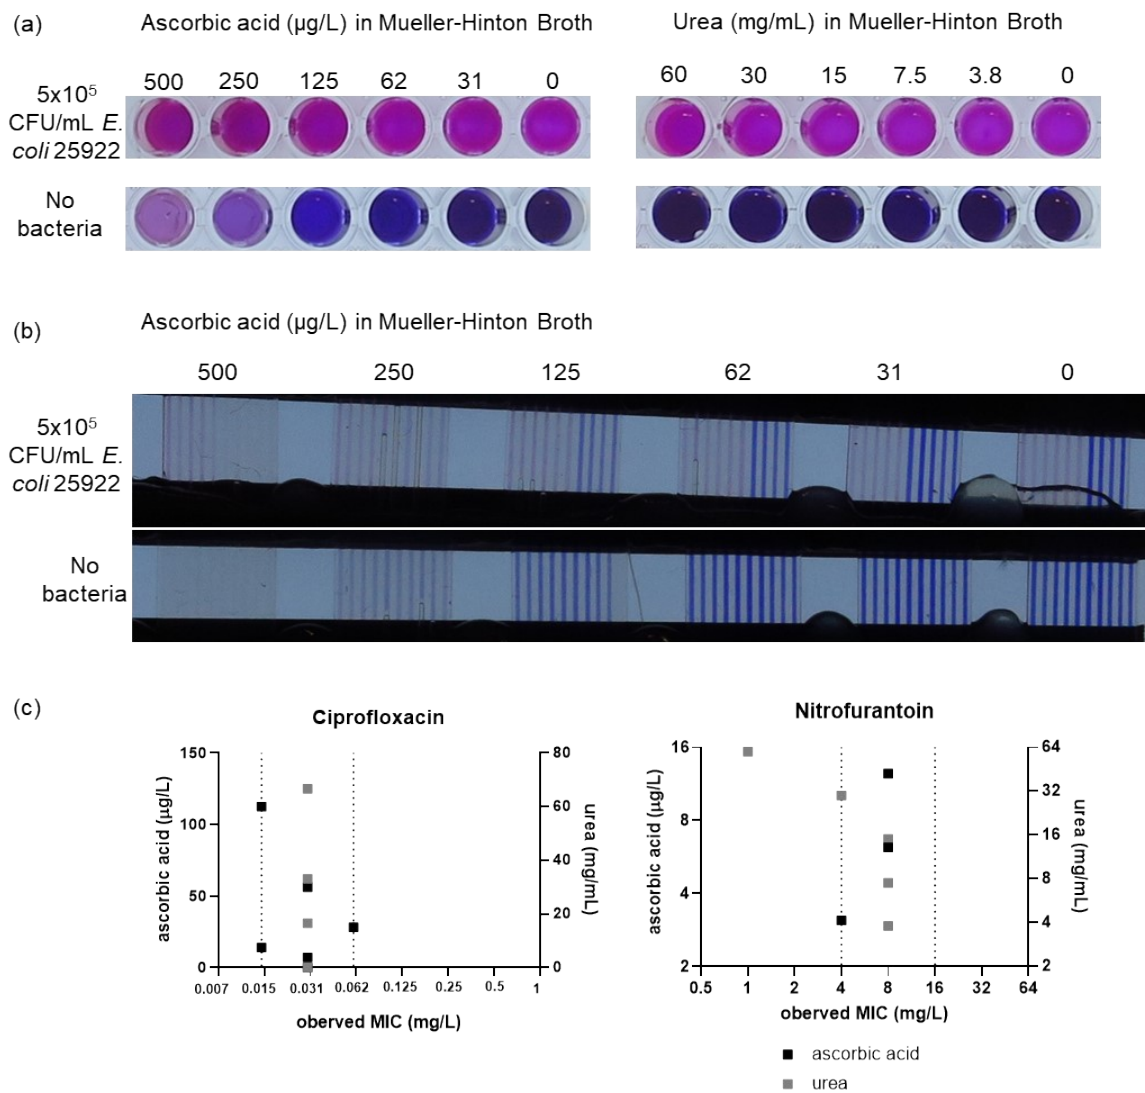

Figure S4. High levels of ascorbic acid interfere in resazurin indicator use. (a) Ascorbic acid and urea were diluted in MHB and inoculated with and without *E. coli* 25922 overnight at 37 °C. (b) Nitrofurantoin MIC test strips ranging from left-right, 0-64 mg/L nitrofurantoin were tested with ascorbic acid diluted in MHB and incubated overnight at 37 °C. (c) The observed MIC results for nitrofurantoin and ciprofloxacin in MHB supplemented with either ascorbic acid or urea performed in microcapillary test strips. Vertical dotted lines indicate  $\pm 1$  doubling dilution of antibiotic from the MHB control.

Table S1. Summary of articles using direct urine sampling for antimicrobial susceptibility tests in microfluidic devices

| Sample                                                                   | Summary                                                                                                              | MIC or Single antibiotic concentration | Reference |
|--------------------------------------------------------------------------|----------------------------------------------------------------------------------------------------------------------|----------------------------------------|-----------|
| Spiked healthy urine (sample exchanged with media)                       | Bacteria trap in channels – single cell time lapse imaging                                                           | Single concentration                   | (1)       |
| Spiked healthy urine (commercial urine)                                  | Urine diluted 1:20 and mixed with antibiotics prior to loading in microchannel and electrical signals measured       | MIC                                    | (2)       |
| Spiked culture negative urine (sample exchanged with media)              | Bacteria growth determined by resazurin fluorescence in the presence or absence of antibiotics in droplets.          | Single concentration                   | (3)       |
| 5 positive clinical samples (sample exchanged with media)                | Filter bacteria from urine and resuspended in growth media – resazurin detection in nanolitre array                  | Single concentration                   | (4)       |
| 25 clinical samples diluted 1:10 in media (21 bacteria positive samples) | Single cell trapping and imaging in microchannel and imaging. Sample mixed with breakpoint antibiotic before loading | Single concentration                   | (5)       |
| 24 clinical sample diluted 1:2 in media (12 bacteria positive samples)   | Bacteria incubated with antibiotics and single cell counted in cuvettes using light scattering microscopy            | MIC                                    | (6)       |
| 60 clinical samples diluted 1:10 in media (30 bacteria positive samples) | Bacteria incubated with antibiotics and single cell counted in cuvettes using light scattering microscopy            | Single concentration                   | (7)       |
| 215 clinical samples diluted 1:2                                         | Urine incubated with antibiotics for 2.5h followed by electrochemical based 16S rRNA detection                       | Single concentration                   | (8)       |

Table S2. pH and dipstick tests of urine samples

|    | Urine ID | pH electrode | LEU/ $\mu$ L | NIT (mg/dL) | URO (mg/dL) | PROTEIN (mg/dL) | BLOOD (Ery/ $\mu$ L) | SPECIFIC GRAVITY | KET | BILIRUBEN (mg/dL) | GLUCOSE (mg/dL) | ASCORBIC ACID ( $\mu$ g/L) |
|----|----------|--------------|--------------|-------------|-------------|-----------------|----------------------|------------------|-----|-------------------|-----------------|----------------------------|
| 1  | 001.01   | 6.83         | NEG          | NEG         | 0.2         | NEG             | NEG                  | 1.025            | NEG | 1                 | NEG             | 0                          |
| 2  | 004.01   | 6.44         | NEG          | NEG         | NEG         | 15              | POS (+)              | 1.015            | NEG | 1                 | NEG             | 0                          |
| 3  | 010.01   | 7.79         | NEG          | NEG         | NEG         | 15              | NEG                  | 1.01             | NEG | NEG               | NEG             | 50                         |
| 4  | 008.01   | 8.42         | NEG          | NEG         | NEG         | 15              | POS (+)              | 1.005            | NEG | NEG               | NEG             | 50                         |
| 5  | 017.01   | 6.95         | NEG          | NEG         | NEG         | 30              | NEG                  | 1.03             | NEG | NEG               | NEG             | 50                         |
| 6  | 002.01   | 7.95         | NEG          | NEG         | NEG         | 15              | NEG                  | 1.01             | NEG | NEG               | NEG             | 100                        |
| 7  | 006.01   | 7.68         | NEG          | NEG         | NEG         | 30              | 5-10                 | 1.02             | NEG | NEG               | NEG             | 300                        |
| 8  | 020.01   | 6.46         | NEG          | NEG         | NEG         | 15              | POS (+++)            | 1.015            | NEG | NEG               | NEG             | 50                         |
| 9  | 001.04   | 6.97         | NEG          | NEG         | NEG         | 15              | NEG                  | 1.010            | NEG | 1                 | NEG             | 100                        |
| 10 | 012.01   | 8.31         | 700+ Leu     | NEG         | NEG         | NEG             | NEG                  | 1.005            | NEG | NEG               | NEG             | 0                          |
| 11 | 001.03   | 7.59         | NEG          | NEG         | NEG         | NEG             | NEG                  | 1.01             | NEG | NEG               | NEG             | 50                         |
| 12 | 013.01   | 8.37         | NEG          | NEG         | NEG         | NEG             | NEG                  | 1.01             | 15  | NEG               | NEG             | 100                        |
| 13 | 024.01   | 7.75         | NEG          | NEG         | NEG         | 15              | NEG                  | 1                | NEG | NEG               | NEG             | 0                          |
| 14 | 014.01   | 7.99         | NEG          | NEG         | NEG         | 15              | NEG                  | 1.005            | NEG | NEG               | NEG             | 0                          |
| 15 | 015.01   | 7.65         | NEG          | NEG         | NEG         | 15              | NEG                  | 1.015            | NEG | NEG               | NEG             | 100                        |
| 16 | 007.01   | 8.03         | NEG          | NEG         | NEG         | NEG             | POS (+)              | 1                | NEG | NEG               | NEG             | 0                          |

Table S3. Composition of pooled urine samples

|                | Number of individual urine samples | Urine ID                                                                                        |
|----------------|------------------------------------|-------------------------------------------------------------------------------------------------|
| Pooled urine 1 | 5                                  | 012.01, 001.03, 013.01, 006.01, 001.04                                                          |
| Pooled urine 2 | 5                                  | 024.01, 008.01, 010.01, 004.01, 002.01                                                          |
| Pooled urine 3 | 15                                 | 012.01, 001.03, 013.01, 006.01, 001.04, 014.01, 024.01, 008.01, 010.01, 004.01, 002.01, 015.01, |

1. Baltekin Ö, Boucharin A, Tano E, Andersson DI, Elf J. Antibiotic susceptibility testing in less than 30 min using direct single-cell imaging. *Proceedings of the National Academy of Sciences*. 2017;114(34):9170.
2. Yang Y, Gupta K, Ekinci KL. All-electrical monitoring of bacterial antibiotic susceptibility in a microfluidic device. *Proceedings of the National Academy of Sciences*. 2020;117(20):10639.
3. Zhang P, Kaushik AM, Mach KE, Hsieh K, Liao JC, Wang T-H. Facile syringe filter-enabled bacteria separation, enrichment, and buffer exchange for clinical isolation-free digital detection and characterization of bacterial pathogens in urine. *The Analyst*. 2021;146(8):2475-83.
4. Avesar J, Rosenfeld D, Truman-Rosentsvit M, Ben-Arye T, Geffen Y, Bercovici M, et al. Rapid phenotypic antimicrobial susceptibility testing using nanoliter arrays. *Proceedings of the National Academy of Sciences*. 2017;114(29):E5787.
5. Li H, Torab P, Mach KE, Surrette C, England MR, Craft DW, et al. Adaptable microfluidic system for single-cell pathogen classification and antimicrobial susceptibility testing. *Proceedings of the National Academy of Sciences*. 2019;116(21):10270.
6. Mo M, Yang Y, Zhang F, Jing W, Iriya R, Popovich J, et al. Rapid Antimicrobial Susceptibility Testing of Patient Urine Samples Using Large Volume Free-Solution Light Scattering Microscopy. *Analytical chemistry*. 2019;91(15):10164-71.
7. Zhang F, Jiang J, McBride M, Yang Y, Mo M, Iriya R, et al. Direct Antimicrobial Susceptibility Testing on Clinical Urine Samples by Optical Tracking of Single Cell Division Events. *Small*. 2020;16(52):2004148.
8. Mach KE, Mohan R, Baron EJ, Shih M-C, Gau V, Wong PK, et al. A biosensor platform for rapid antimicrobial susceptibility testing directly from clinical samples. *The Journal of urology*. 2011;185(1):148-53.

## References
